# Supplementary material
Source: PubMed Central journal article supplement (PMC4714552)
Supplement: supp_fj.15-278309_Supplemental_Figure1.pdf [file supp_fj.15-278309_Supplemental_Figure1.pdf]

Supplemental Figure 1

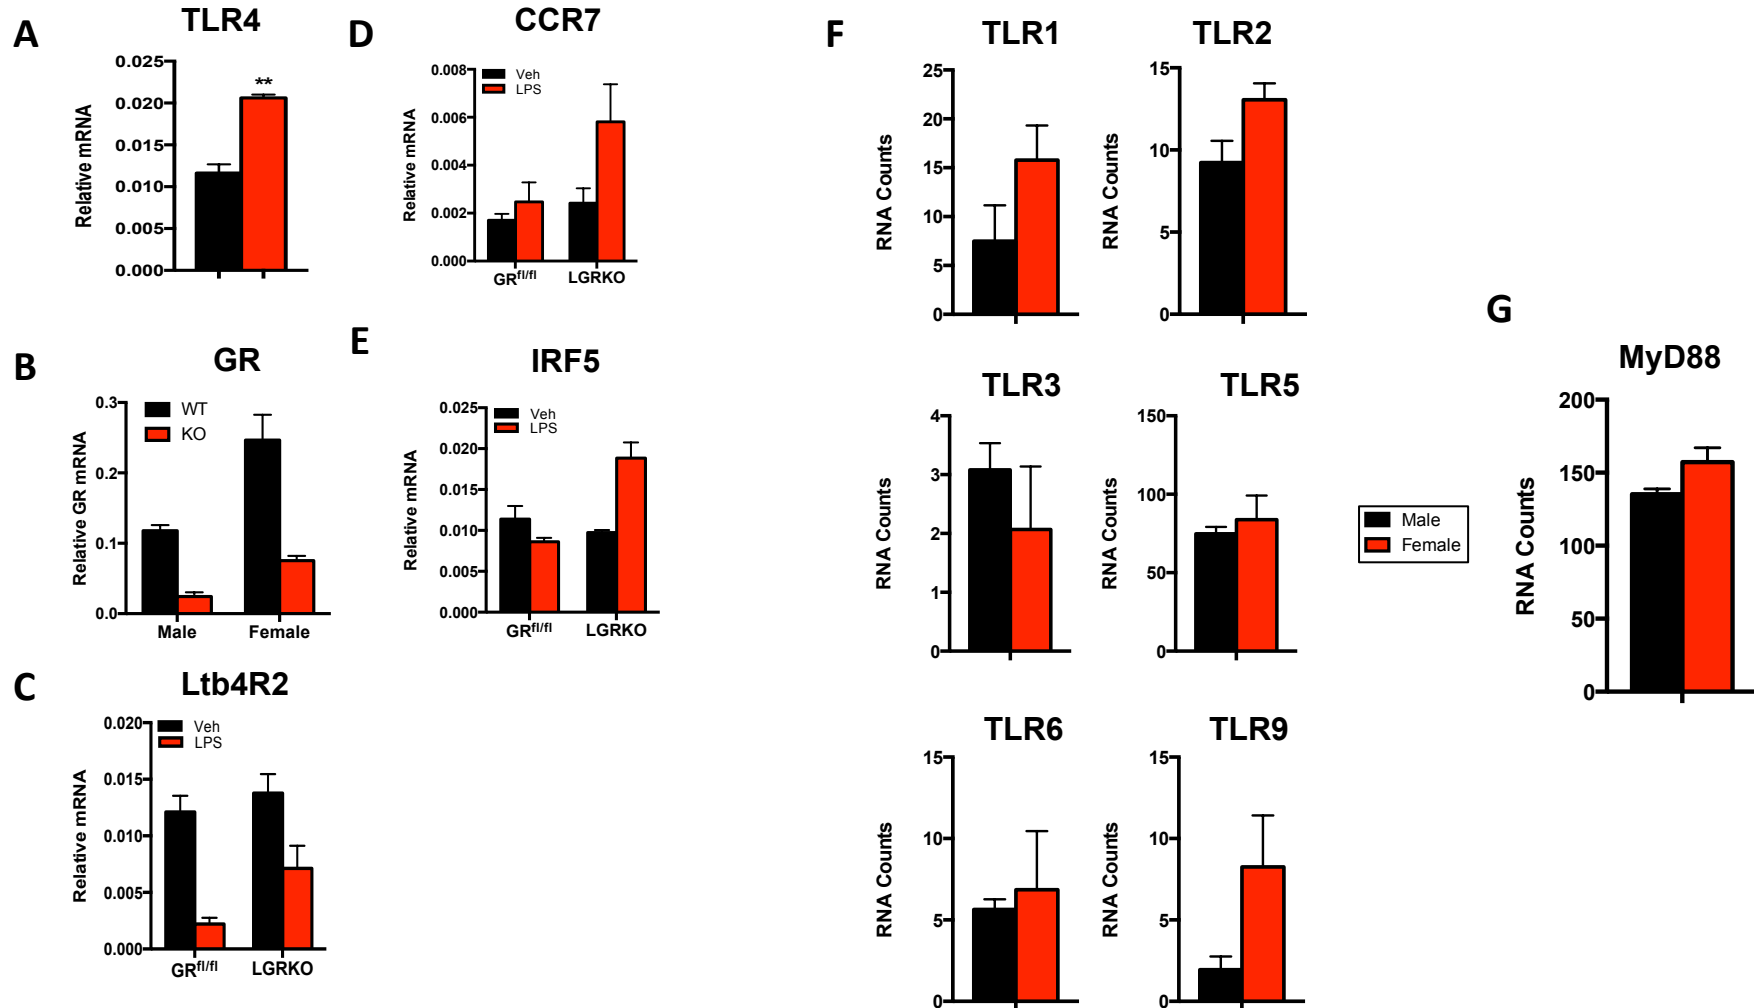

**Supplemental Figure 1: (A-E)** qPCR validation of various genes from Nanostring analysis. **(F)** Liver RNA counts of TLR's and **(B)** MyD88 in male and female mice. n=independent animals.
