# Supplementary material
Source: PubMed Central journal article supplement (PMC4714552)
Supplement: supp_fj.15-278309_Supplemental_Figure2.pdf [file supp_fj.15-278309_Supplemental_Figure2.pdf]

## Supplemental Figure 2

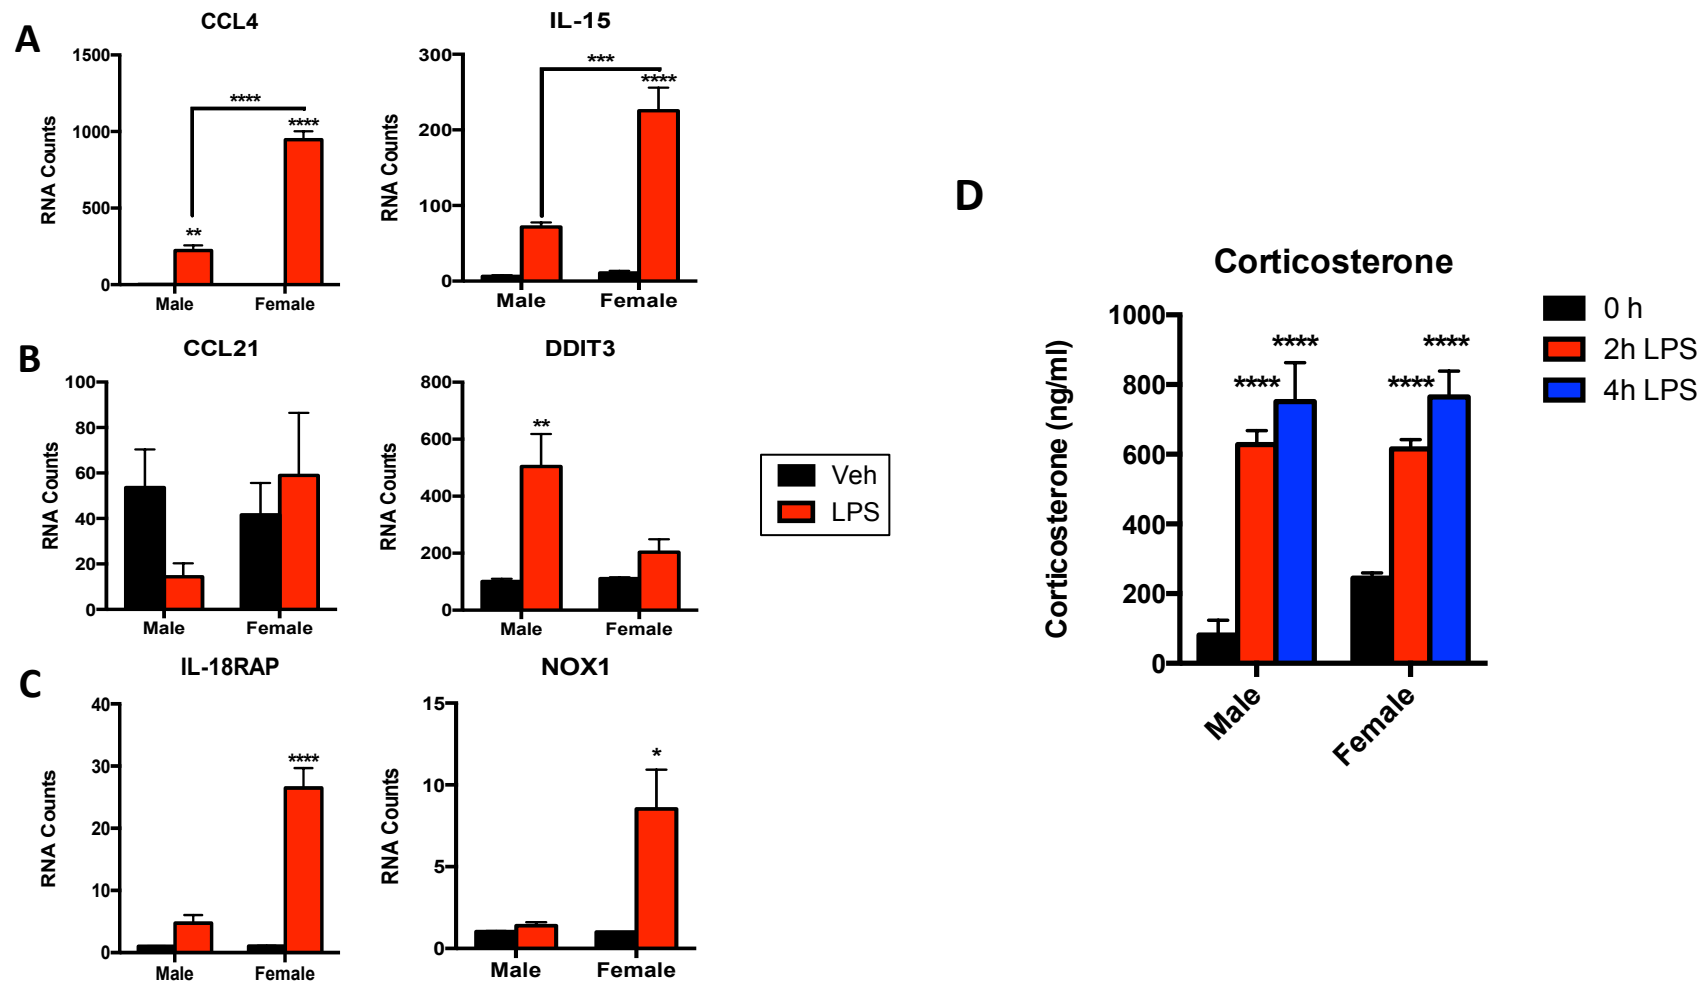

**Supplemental Figure 2:** WT C57bl/6J mice have sex-sensitive genes regulated by LPS. Liver RNA counts of male and female mice treated with vehicle or LPS for 4 hours showing LPS regulated female-sensitive genes (**A**), LPS regulated male-sensitive genes (**B**) and LPS regulated non sex-biased genes (**C**).  $n=3$  biological replicates. \* denotes  $p<0.05$ , \*\*  $p<0.01$ , \*\*\*  $p<0.001$ , \*\*\*\*  $p<0.0001$ . (**D**) Circulating corticosterone levels from male and female mice treated with LPS (5mg/kg) detected by ELISA. Data are expressed as corticosterone (ng/ml)  $\pm$  SEM;  $n=3-4$ , \*\*\*\* denotes  $p<0.0001$ .
