# Supplementary material
Source: PubMed Central journal article supplement (PMC4714552)
Supplement: supp_fj.15-278309_Supplemental_Figure3.pdf [file supp_fj.15-278309_Supplemental_Figure3.pdf]

### Supplemental Figure 3

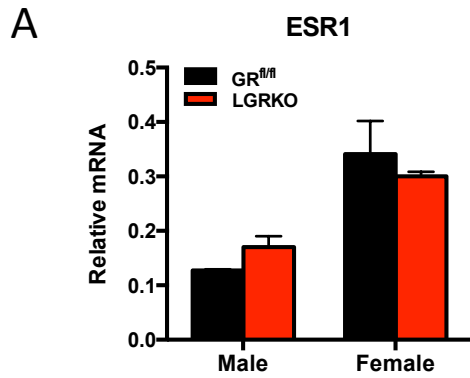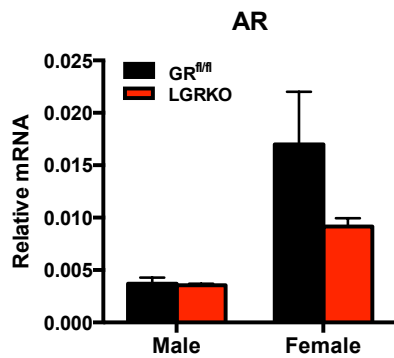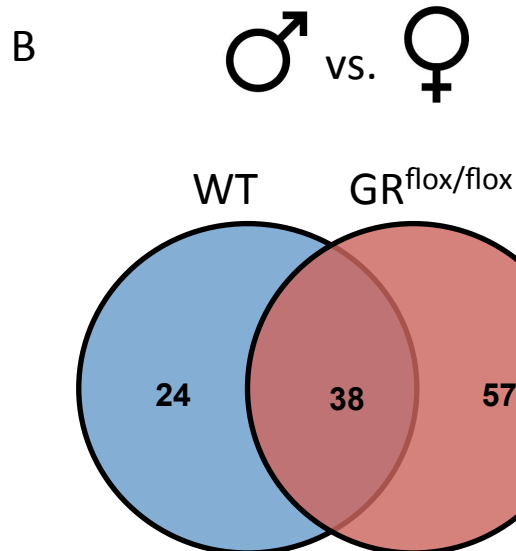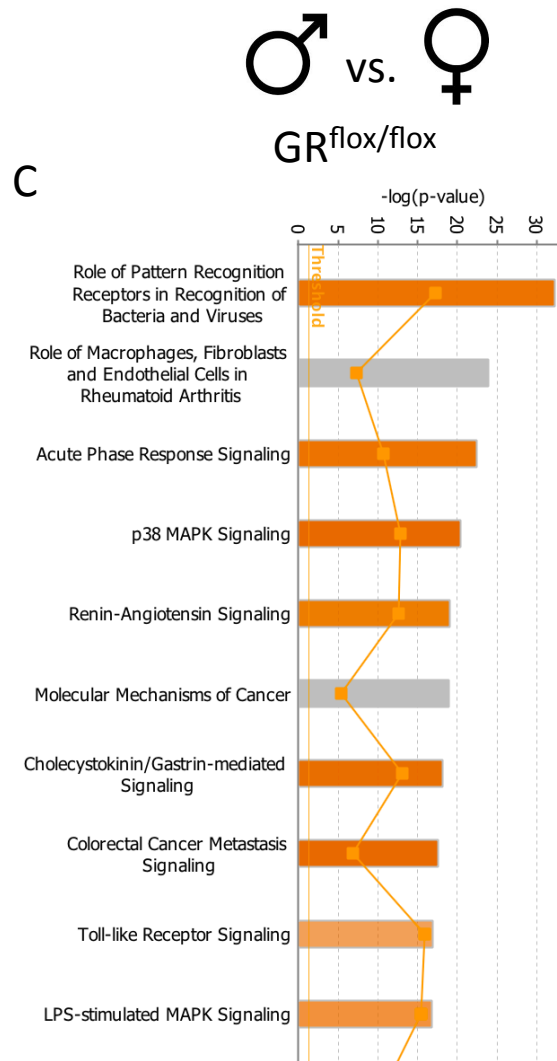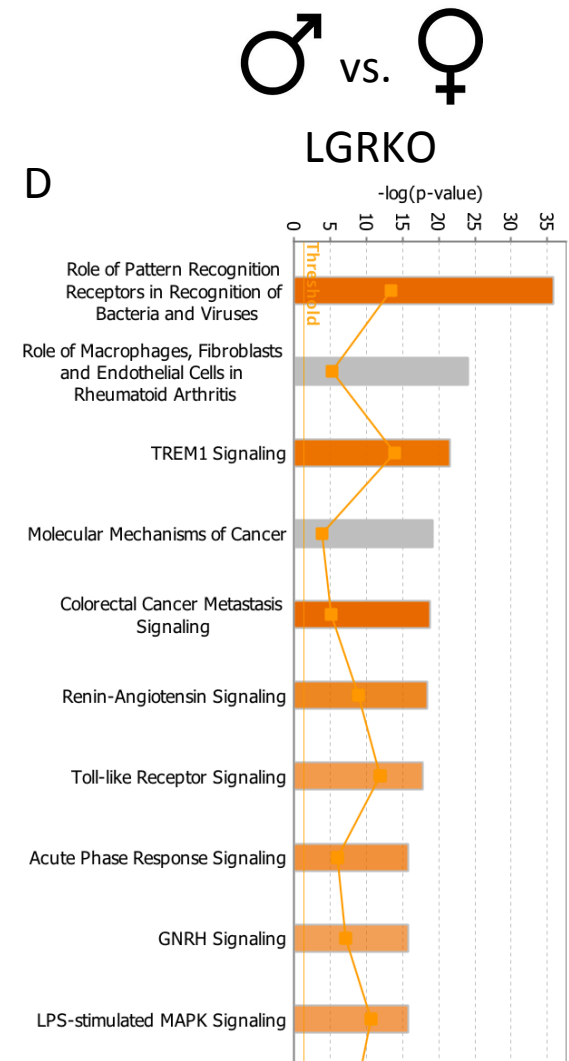

**Supplemental Figure 3:** Sexual dimorphic inflammatory gene expression in WT C57bl/6J mice and GR<sup>fl/fl</sup> mice. **(A)** Quantitative PCR for estrogen receptor and androgen receptor in male and female GR<sup>fl/fl</sup> mice and LGRKO mice. Data are expressed as relative mRNA to PPIB ± SEM; n=3. **(B)** Venn diagram of sexually dimorphic inflammatory genes in C57bl/6J mice and GR<sup>fl/fl</sup> mice. **(C)** Top 10 canonical pathways identified by IPA of Nanostring data in GR<sup>fl/fl</sup> mice and LGRKO mice **(D)**.
