# Supplementary material
Source: PubMed Central journal article supplement (PMC4714552)
Supplement: supp_fj.15-278309_Supplemental_Figure4.pdf [file supp_fj.15-278309_Supplemental_Figure4.pdf]

## Supplemental Figure 4

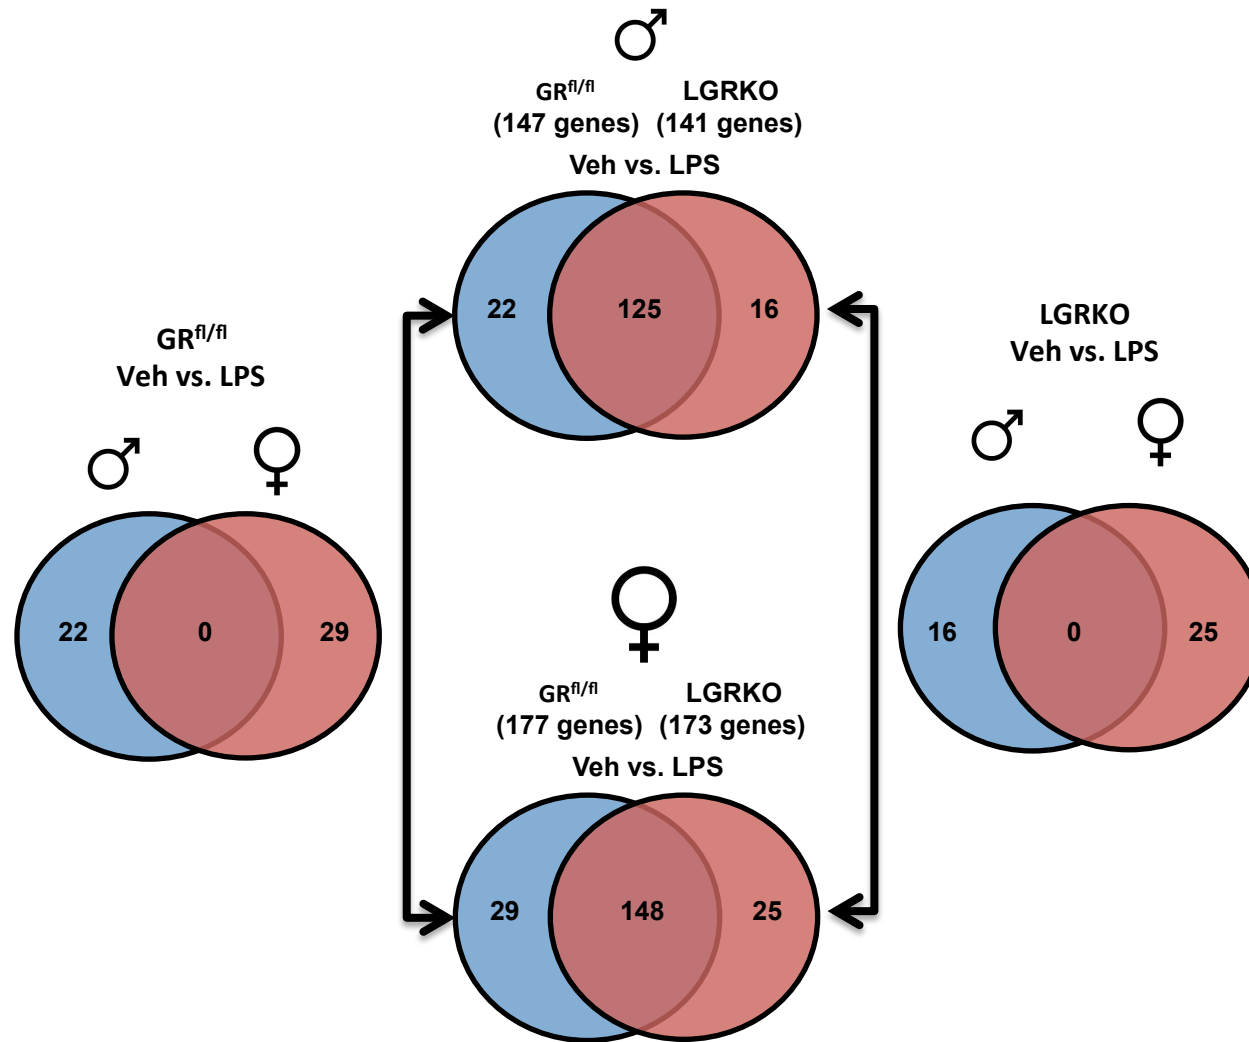

**Supplemental Figure 4:** Sex-specific glucocorticoid target genes following LPS administration. Venn diagram of LPS regulated genes in male and female GR<sup>fl/fl</sup> and LGRKO. Outside Venn compares male and female WT-specific LPS regulated genes (left Venn diagram) and LGRKO-specific LPS regulated genes (right Venn diagram).
